## Association of climatic determinants with Type 1 and Type 2 Diabetes worldwide: Night length and photoperiod variation linked to T1D and sunshine to T2D

**Julien Lacouchie**<sup>1,2\*</sup>

<sup>1</sup>Faculté de médecine, Université de Montréal

<sup>2</sup>UFR de médecine, Université de Reims Champagne-Ardenne

\*correspondance : [julien.lp72@gmail.com](mailto:julien.lp72@gmail.com)

### Abstract

Diabetes is one of the fastest growing diseases today. Whereas its North-South prevalence gradient and seasonality of diagnostics suggest the role of climate in diabetes etiology, only little is known about the impact of climate on diabetes. This article aims to study several climatic variables and their association with type 1 diabetes (T1D) and type 2 diabetes (T2D) worldwide and in Europe. Climatic variables under study are sunshine, temperature, solar irradiance and day length (photoperiod). Prevalence data come from international Diabetes Federation (2021) and T1D monthly incidence come from Eurodiab centers (1989-2008). Diabetes prevalence are associated with latitude in a curvilinear manner ( $r^2=0,43$  for T1D and  $r^2=0,29$  for T2D,  $p<0,001$ ), T1D is more prevalent at extreme latitudes whereas T2D prevalence is higher near equator. Each climatic variable studied is negatively associated with T1D and positively associated with T2D prevalence in simple regression ( $p<0,001$ ). Multicollinearity is assessed with Variance inflation factor (VIF) and reduced with multiple regression. After adjustment for other climatic variables, only photoperiod (daylength) is associated with T1D prevalence ( $r^2=0,45$ ) and sunshine with T2D prevalence ( $r^2=0,48$ ). T1D monthly incidences are approximated with a cosine regression ( $RR=1,53$ ,  $r^2=0,71$ ) which is significantly associated with photoperiod variation along the year in Europe once adjusted for irradiance ( $p=1,77.e-2$ ). The relation between photoperiod and T1D has never been reported before in an ecological study and a short review is developed in the discussion. This research advocates for the basic understanding of circadian-circannual rhythm and the prevention of circadian disturbances for individuals prone to T1D.

## Introduction

Diabetes prevalence is rising worldwide with more than half billion diabetic individuals affected today. This prevalence is expected to rise in the future decades (International Diabetes federation, IDF, 2023) and this increase will have significant impact on individuals and health systems.

Diabetes is mainly represented by Type 1 Diabetes (T1D) and Type 2 Diabetes (T2D). T1D is more incident among young individuals (<20 years) and requires a life-long insulin treatment (IDF, 2023, Venables and Jeukendrup, 2009) whereas T2D reaches rather adults with several risks factors including overweight and physical inactivity (American Diabetes association, 2019; IDF, 2023; Venables and Jeukendrup, 2009).

For T1D, numerous studies have shown a spatio-temporal (latitude and season dependant) gradient of its incidence for different countries and regions in the world (Mohr, 2008; Akerblom, 1988, Zhao et al. 2014). Those season and geographic gradients are arguments for the role of climate in diabetes etiology. In some research, T1D distributions have been attributed to temperature (DERIG, 1988, Rewers et al., 2016, Waernbaum and Dahlquist 2016, Patterson et al. 2015, Speakman et al. 2016; Minamoto-Higashioka et al. 2019) or ultraviolet B irradiance and vitamin D status (Mohr et al., 2008) but it remains unclear which factor is the most associated. We also do the hypothesis that day length extremum would be associated with diabetes, indeed several studies

have reported associations between circadian rhythm and diabetes (Bailey et al. 2014) but no studies have shown this relation on ecological and world level.

In parallel, ecological research interested by climate and T2D are almost absent, even if it is, by far, the most frequent diabetes. Clinical evidences showed that temperature increased the severity of symptoms (Speakman et al. 2016, Hajat et al. 2017) and that month of patient birth or seasonal episodes of hyperglycemia could be associated with T2D risk (Jiahui et al. 2017). Those studies give argument for a distribution of T2D which depends on climate, to our knowledge, only few studies are addressing this question. It should also be noted that studies have sometimes contradictory results (Jensen et al. 2015, Jiwa et al. 2016).

More importantly, global warming will impact earth climate in the next decades. Climate change may modulate diabetes prevalence, as well as people wellbeing and public health measures (Parmesan et al. 2022), it is another reason why the relation climate-diabetes should be better understood today.

Therefore, this article will study both T1D and T2D diabetes associations and several climatic factors (temperature, sunshine, irradiance, daytime) at the global scale giving more clues about the environmental factor contributing to diabetes. Explaining models will be proposed regarding the results and literature.

## Method

### Diabetes data

Diabetes national prevalence for adult (20-79 years old, age-adjusted) and T1D national case number come from the International Diabetes Federation (IDF Atlas, 10<sup>th</sup> edition - 2021). The 68 countries/regions selected were chosen for the high quality of diabetes data (according to IDF 2017) and because all meteorological data were also available for those countries. Total population included in this study accounts includes approximately 5.420.183.000 individuals (World Bank, 2015).

Between 85 and 95% of total diabetes prevalence is composed by T2D (IDF, 2021; NCD-RisC, 2016), therefore total prevalence are used as estimates of T2D prevalence, as already done in other studies (NCD-RisC, 2016). When available T1D prevalence data from diamond studies were used (Karvonen et al. 2000). For the analysis of T1D seasonality, incidence data (boys and girls, 1989-2008) came from a pan-national expert group (Eurodiab) focusing on T1D incidence found in 22 European countries and were graciously given by Dr. Patersson (Patterson et al. 2015).

### Climatic data

Countries latitudes are centroid latitudes coming from worldmap Harvard data (2019). The sun-related parameters come either from equations (daytime, total irradiance) or ground meteorological stations (temperature, sunshine). Datas for Health expenses per capita come from the World Bank for the year 2015 and are expressed in current US dollar, this variable is used as control for confusion factors.

The daytime (D) equation comes from the National Oceanic and Atmospheric Administration (NOAA) based on the method of Jean Meus (NOAA, 2020) and gives the length of the day from sunrise to sunset (in minutes) such as:

$$D(\phi) = 8 * \left( \cos^{-1} \left( \frac{\cos 90.83}{\cos \phi * \cos \delta} \right) - \tan \phi * \tan \delta \right)$$

$\phi$  and  $\delta$  are respectively the latitude of the corresponding country ( $^{\circ}$ ) and the sun

declination ( $^{\circ}$ ). Reversely, average yearly night length (Fig.2) is obtained by subtracting D to the calendar length of the day (24 hours). It is worth mentioning that high average for yearly daytime for a country also means high variations in the daytime during the year. Repartition between night and day length is called photoperiod in the rest of the article.

Irradiance (I) is calculated at noon on the top atmosphere on the date of the winter solstice for each country;  $I(\phi)$  was obtained with the formula:  $I(\phi) = 1367 * \cos(\phi \pm 23.5)$ . It comes from total irradiance equation (Wald, 2018) and is used by other research about irradiance and health (Mohr et al. 2007).

The ground measured temperatures (monthly max and min) were retrieved from the Global Historical Climatology Network Daily (GHCND) from the NOAA data base for the years between 1975 and 2010 (NOAA, 2018). Ground measured sunshine duration were gathered from the United Nation data base for the years between 1961 and 2015 (World Meteorological Organization, 2020). Using more than 30 years of data allows to study climate as defined by the WMO. Meteorological stations were chosen based on their proximity to countries centroid.

Solar irradiance indicates total solar radiation reaching one latitude on top atmosphere. Here, it is calculated for the winter solstice and it is an indicator of solar intensity at this moment as it has been done in a previous reference article (Mohr et al. 2007). Instead of using complex correction or extrapolation to deduce ground irradiance, we used sunshine which measures the duration of a solar beam with a ground instrument (pyranometer with a threshold near 120 W/m<sup>2</sup>). It indicates a direct solar radiation (both in intensity and volume) is based on empiric ground measurement and accounts for the cloudiness. Daytime indicates the duration of the day from sunrise to sunset, it both measures direct and diffusive sunlight and put

emphasize on duration of sunlight rather than only intensity.

Association between diabetes and both average, maximum or minimum monthly temperature (or average, max or minimum sunshine) have been evaluated. Average temperature and minimum monthly sunshine were the most associated parameters. Our understanding is that sunshine measurements are more sensitive for the minimum value (near the burning threshold, far from the threshold there is no distinction between higher or lower energy). Monthly irradiance (all sky surface downward irradiance) used in seasonality study are obtained from the NASA Langley Research Center POWER (project from NASA Earth Science Directorate Applied Science Program). Data are accessible online.

### Statistics and data processing

The regressions are based on polynomial regressions (2<sup>nd</sup> order) for Fig. 1; on linear regression for Fig. 2, Tab. I and II; and on cosine regression for Fig. 3. Multiple linear

regression (MR) is used in Tab. I and II, the optimized model includes only 2 variables and is based on sequential MR giving the most efficient model. Variance inflation factor (VIF) is calculated to control the risk for multicollinearity (Tab. III.). All data are processed with R (3.6.2) and figures are done in Libre Office.

### Seasonality study

The seasonality study employs the improvement of the geometric method of Edward (1961) brought by Brookhart and Rothman (2008).

In summary, the seasonality of the monthly count of T1D cases are tested by comparing the distribution of diabetes data against the variance of a homogeneous (non-seasonal) distribution ( $\chi^2$ , 2 df). Because this test was significant, a non-homogeneous Poisson process is applied and monthly T1D cases are estimated by the function  $f$  and can be expressed as follow:

$f(t) = 1 + 0,21 * \cos\left[\left(\frac{2\pi}{12}\right) * (t - 0,5)\right]$  where  $t$  is the numeric value of the month (Jan=1, Dec=12). To confirm the goodness of the fit a  $\chi^2$  test (11 df) is done.

## Results

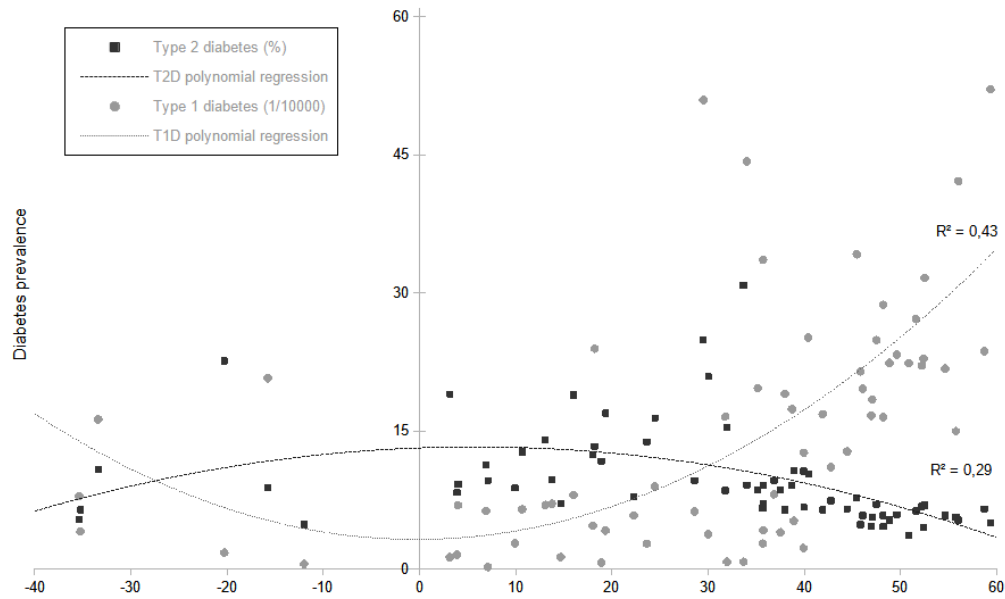

**Fig. 1 Geographic latitudes are associated with T1D (1/10000 ; ●) or T2D prevalence (% ; ■) for 68 countries worldwide (2021).** Polynomial regression (2<sup>nd</sup> order) fits both distribution,  $r^2=0,43$  for T1D,  $r^2=0,29$  for T2D ( $p<0.001$ ).

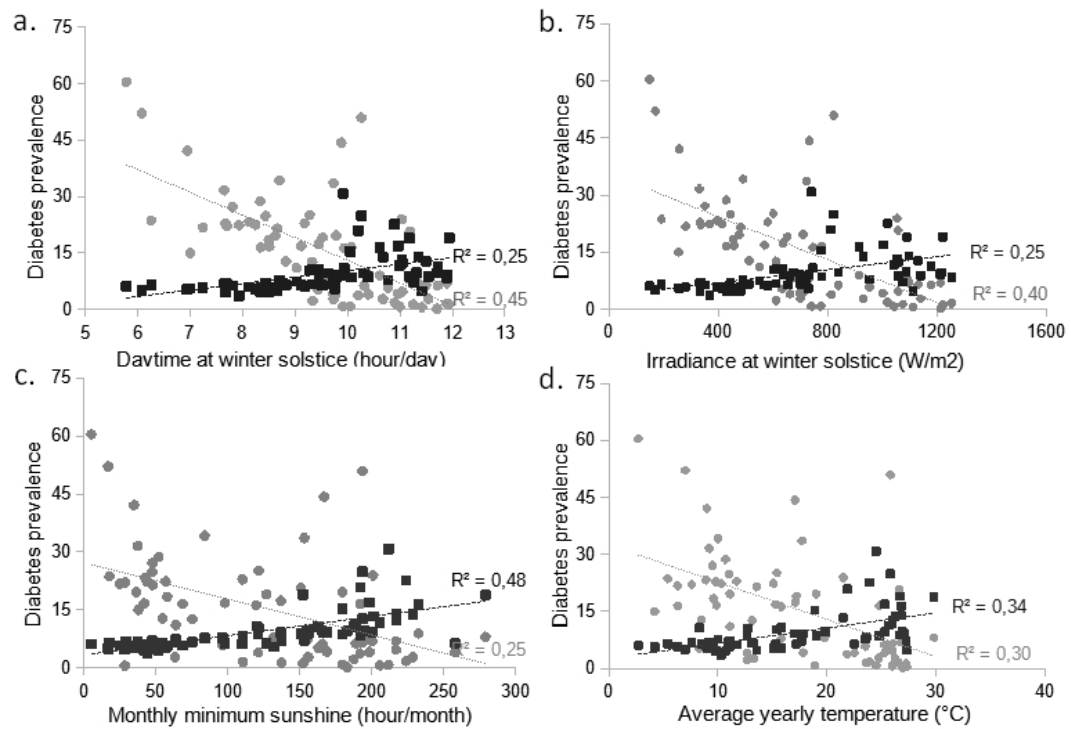

**Fig. 2 - Average daytime at winter solstice (a), irradiance at winter solstice (b), monthly minimum sunshine (c), yearly average temperature (d) are associated with T1D (1/10000 ; ●) or T2D (% ; ■) for 68 countries worldwide.** Associations are based on simple linear regressions and diabetes prevalence are significantly associated for each climatic variable used ( $p<10.e-4$ ).

**Tab. I - T2D prevalence (%) - Simple and multiple linear regression with sun-related variables**

| Method and variable                               | $\beta$ | CI                  | $r^2$ | p         |
|---------------------------------------------------|---------|---------------------|-------|-----------|
| <b>Univariate</b>                                 |         |                     |       |           |
| Monthly minimum sunshine (hour/month)             | 0,05    | [0,04 ; 0,06]       | 0,48  | 7,45 e-11 |
| Average yearly temperature (°C)                   | 0,40    | [0,26 ; 0,54]       | 0,34  | 2,19 e-7  |
| Irradiance at Winter solstice (W/m <sup>2</sup> ) | 0,008   | [0,005 ; 0,012]     | 0,25  | 1,36 e-5  |
| Daytime at Winter solstice (hour/day)             | 1,71    | [0,98 ; 2,44]       | 0,25  | 1,77 e-5  |
| Health expenses per capita (\$)                   | -0,0009 | [-0,0015 ; -0,0003] | 0,12  | 3,88 e-3  |
| <b>Multivariate – total</b>                       |         |                     |       |           |
| Monthly minimum sunshine (hour/month)             | 0,05    | [0,03 ; 0,07]       | ...   | 6,34 e-5  |
| Model 5 variables                                 |         |                     | 0,50  | 1,89 e-8  |
| <b>Multivariate – optimized</b>                   |         |                     |       |           |
| Monthly minimum sunshine (hour/month)             | 0,05    | [0,04 ; 0,06]       | ...   | 3,76 e-9  |
| Health expenses per capita (\$)                   | -0,0003 | [-0,0008 ; -0,0002] | ...   | 0,27      |
| Model 2 variables                                 |         |                     | 0,49  | 4,00 e-10 |

Health expenses per capita is used as a control. Multivariate - total is a MR model including all variables (5), only sunshine is significantly associated in this model. The last part of the table (optimized) includes only two variables maximizing the determination coefficient. Confidence interval (CI), 95 %.

**Tab. II - T1D prevalence (1/10000) - Simple and multiple regression with sun-related variables**

| Method and variable                               | $\beta$ | CI               | $r^2$ | p         |
|---------------------------------------------------|---------|------------------|-------|-----------|
| <b>Univariate</b>                                 |         |                  |       |           |
| Daytime at Winter solstice (hour/day)             | -6,03   | [-7,63 ; -4,43]  | 0,45  | 3,19 e-10 |
| Irradiance at Winter solstice (W/m <sup>2</sup> ) | -0,03   | [-0,04 ; -0,02]  | 0,39  | 7,47 e-9  |
| Average yearly temperature (°C)                   | -0,98   | [-0,62 ; -1,34]  | 0,3   | 1,31 e-6  |
| Monthly minimum sunshine (hour/month)             | -0,09   | [-0,13 ; -0,05]  | 0,25  | 1,54 e-5  |
| Health expenses per capita (\$)                   | 0,003   | [0,001 ; 0,004]  | 0,16  | 7,92 e-4  |
| <b>Multivariate – total</b>                       |         |                  |       |           |
| Daytime at Winter solstice (hour/day)             | -12,33  | [-20,72 ; -3,94] | ...   | 5,53 e-3  |
| Model 5 variables                                 |         |                  | 0,5   | 2,05 e-8  |
| <b>Multivariate – optimized</b>                   |         |                  |       |           |
| Daytime at Winter solstice (hour/day)             | -9,09   | [-12,89 ; -5,29] | ...   | 1,43 e-5  |
| Average yearly temperature (°C)                   | 0,67    | [-0,09 ; 1,43]   | ...   | 8,68 e-2  |
| Model 2 variables                                 |         |                  | 0,48  | 6,89 e-10 |

The first part of the table (univariate) presents simple linear regressions with diabetes prevalence. Health expenses per capita is used as a control. The model multivariate - total is a MR including all variables (5), only daytime at winter solstice is significantly associated in this model. The last part of the table (optimized) is a MR with only two variables exhibiting the highest determination coefficient. Confidence interval (CI), 95 %

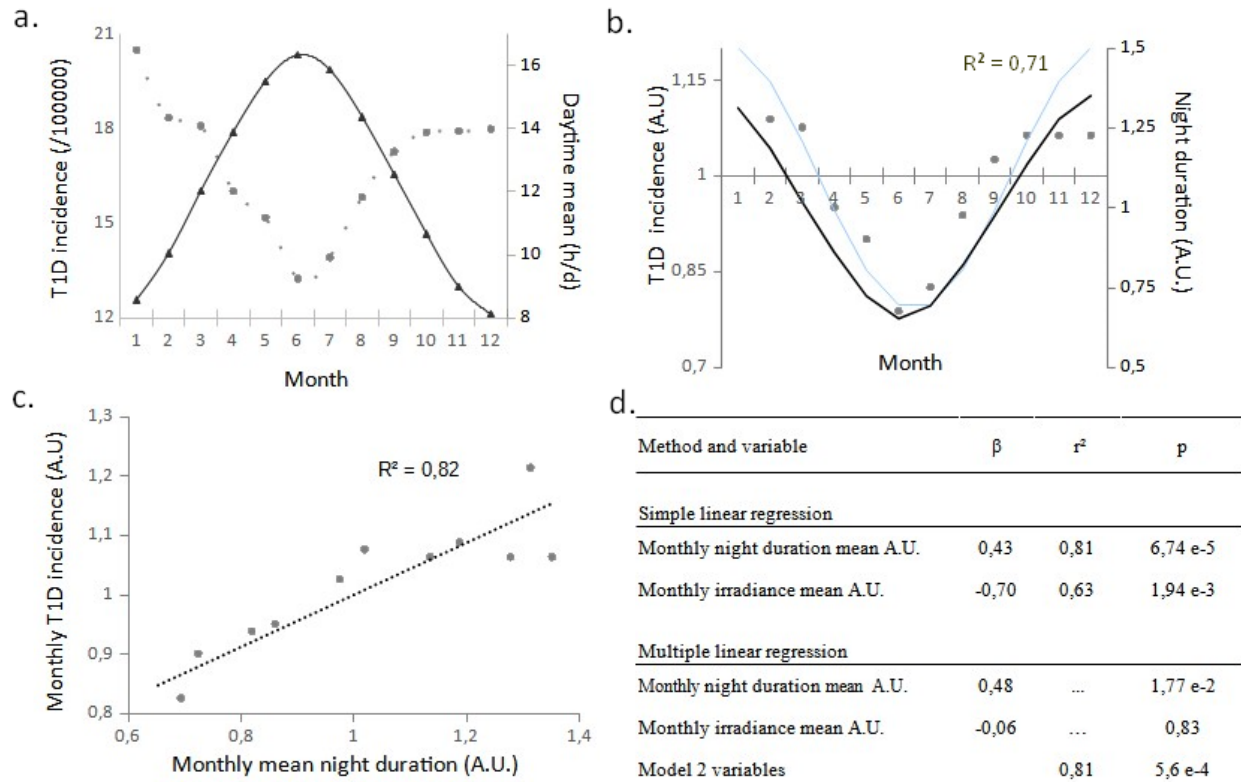

**Fig. 3 T1D monthly incidence is significantly associated with photoperiod along the year in Europe** **a.** Monthly T1D incidence for 23 Eurodiab centers (1/100 000; ●) and photoperiod (continuous line) variation along the year **b.** normalized T1D incidence approximated with cosine regression based on Broohart method (grey line,  $R^2=0.71$ ,  $p<0.001$ ; RR = 1,53) and normalized night length (black line) along the year **c.** monthly T1D incidence plotted against monthly mean night duration with simple linear regression ( $R^2=0.82$ ,  $p<0.001$ ) **d.** Simple and multiple regression for Irradiance total or/and night duration explaining T1D incidence. Incidence diabetes data are pooled results for 84 658 T1D cases from 19 European countries diagnosed between 1989 and 2013. Normalization (A.U) is done by centering the data on the average of the dataset. Daytime, night duration and irradiance are based on 50°N latitude the average latitude of the 23 centers

**Tab III - VIF between independant variables evaluating collinearity**

| Variance inflation factor (VIF) | Average yearly temperature (°C) | Minimum monthly sunshine (h/y) | Daytime at WS (h/d) |
|---------------------------------|---------------------------------|--------------------------------|---------------------|
| Irradiance at WS (W/m2)         | 7,38                            | 2,24                           | 29,43               |
| Average yearly temperature (°C) | -                               | 2,84                           | 5,82                |
| Minimum monthly sunshine (h/y)  | -                               | -                              | 2,37                |

Formula for VIF =  $1/(1-r^2)$ . Data are the same as those used in the Tab I. II and Fig. 2

## Results

### **Geographic latitudes are associated with T1D or T2D prevalence with opposite trends**

T1D prevalence tends to be higher at extreme latitude whereas T2D prevalence is more important near tropics ( $p < 0.001$ , 67 dof). From our knowledge, it is the first time that a relation between latitude and T2D prevalence is presented. The relations between both diabetes prevalence and latitude gives a rational for studying the relation between sun-related parameters and diabetes prevalence.

### **Several sun-related parameters are associated with diabetes prevalence**

T2D prevalence (Fig. 2 and Tab. I) is most associated with monthly minimum sunshine ( $r^2=0.48$ ,  $p=7.45e-11$ ) followed by average yearly temperature ( $r^2=0.34$ ,  $p=2.19e-7$ ), both of which are positive associations. An increase of 1 hour of monthly minimum sunshine is associated with an increase of 0,05 % [0,04;0,06] of T2D prevalence. It should also be noted that an increase of 1 °C is associated with 0,4 % of T2D prevalence [0,26;0,54], this result could be considered for global warming and its potential impact on human health.

For T1D prevalence (Tab. II), daytime at winter solstice is the most associated variable ( $r^2=0.45$ ,  $p=3.19e-10$ ) followed by irradiance ( $r^2=0.39$ ), those are negative associations. Curves shows that daytime and diabetes are particularly associated for higher latitude (over 30° or less than 10 hours at winter solstice). The most associated variables with T1D prevalence are both calculated parameters whereas most associated variables with T2D are measured empirically with ground station. Apparently, the associations between Daytime and T1D or Sunshine and T2D have never been reported before.

### **Photoperiod is significantly associated with T1D prevalence and sunshine is significantly associated with T2D prevalence once adjusted for other sun-related parameters.**

MR models (Tab. I and II) explain until 50 % of diabetes prevalence by environmental factors.

Once adjusted with sunshine for T2D or day length for T1D no other variables are significantly ( $p < 0,05$ ) associated with diabetes prevalence. Nevertheless, each variable is independently associated with diabetes prevalence in simple linear regression models. This contradictory result may be explained by a certain level of multicollinearity, effect that is studied hereafter (Tab. III). Those results suggest that models for T1D must include photoperiod whereas models for T2D should include sunshine other parameters may add precision on case by case.

### **Variation of T1D monthly incidence is significantly associated with photoperiod along the year in Europe**

The association between lower daytime at winter solstice and higher T1D prevalence for 68 countries (tab. II) translates a spatial distribution of the disease because daylength is itself a function of latitude and solar declination. This relatively high correlation ( $r^2=0,45$ ) could suggest a casualty. This possibility would be reinforced if there is a relation of co-temporality between daytime and T1D incidence variation during the year, this question is assessed in Fig. 3.

The pooled data for European T1D incidence (both gender) are not homogeneously distributed along seasons ( $p < 0.001$ ). Cosine regression is applied for the distribution of monthly T1D incidence in Europe ( $R^2=0.71$ ,  $p < 0.001$ ) and correlates well with night length variation along the year (Fig. 3) and gives a seasonal relative risk of 1,53 for T1D incidence along the year. Monthly T1D incidence and night length are minimal in June (Summer solstice) and are maximal between December and January (near winter solstice) (Fig. 3 a). Two month-incidence do not totally confirm this trend, it is the January incidence which is much higher than December. A possible explanation might be cultural events because the month of December is associated with several fests in Europe (Christmas, New year). These events may decrease both the patient consultation and



availability of doctors. Supposing that, December incidence may be underestimated and postponed to January.

In Fig. 3 b, a linear correlation between monthly night duration and monthly T1D incidence confirms a strong temporal correlation between both T1D and photoperiod along the year in Europe ( $r^2=0.81$ ,  $p<0.001$ ), the power of the association should be confirmed by increasing the statistical power. It should be noted that T1D monthly incidence of Children in Shanghai seems to follow a similar pattern along the year (Zhao et al. 2011).

### **Multicollinearity is a challenge for ecological studies regarding climatic variable**

Variance inflation factor (Tab. III) aims to study collinearity between independent variables to confirm Tab. I and II results. Collinearity is viewed as significant if  $10 > VIF > 5$  (Shresta 2020). Temperature is collinear with Irradiance and daylength (resp.  $VIF = 7,38$  and  $5,82$ ). Sunshine is not or only weakly collinear with the other variables. Daytime and irradiance are strongly collinear ( $VIF = 29,43$ ) however the Daytime includes irradiance (power) as well as the dimension of time (day length or photoperiod) which could explain why irradiance is not associated with T1D prevalence once adjusted for daylength.

## Discussion

This study shows, for the first time, an association between T2D prevalence and latitude (Fig. 1). T2D tends to be maximum near equator and to be lower at higher latitude. For T1D, some studies have reported lower incidence near the equator and higher incidence at the pole (Akerblom et al. 1988, Mohr et al. 2008). Those results are reinforced here with prevalence data (Fig. 1). Unlike incidence studies, prevalence distributions suggest link to longer term trends such as evolutive, climatic or solar trends (Wald, 2018). Several studies reported a seasonality for T1D occurrence along the year and this is also showed in fig. 3 for European countries (Dahlquist et al. 1994, Moltchanova et al. 2009, Patterson et al. 2015, Nishioka et al. 2020). Taken together, these results indicate that sun-related parameters modulate diabetes occurrence even if there is no consensus over the most important environmental parameter (Akerblom et al. 1998, Dahlquist et al. 1994, Mohr et al. 2008, Waenbaum 2015, Patterson et al. 2015). This article aims to understand better the relation between climate and diabetes.

Dahlquist and Mustonen (1994) showed that diabetes incidence for Swedish children was independently associated with low sunshine hours and low mean temperature. In the present article, monthly minimal sunshine hours was not associated with T1D prevalence once adjusted for mean temperature (Tab. II). This result is in accordance with the study of Waenbaum (2015) which found an association between T1D and temperature but not with sunshine. This is questioning how much sunshine dependent vitamin D pathway is important in type 1 diabetes etiology at high latitude.

From our knowledge, it is also the first time that an association between T1D prevalence and Day length at Winter solstice is reported ( $r^2=0.45$ , Tab. II). Indeed, sunshine or temperature association becomes insignificant after adjustment for daytime ( $p < 0.01$ ). These results are in accordance with Patterson research that sunshine hours and average temperature have

only little short-term influence on T1D incidence (Patterson et al. 2015). It is also in agreement with the association between UV and T1D (Mohr et al. 2008) as Daytime period is both an indicator of sunlight duration and intensity. In our results, photoperiod explains 45% of T1D prevalence and its spatial distribution (Fig. 1, Fig. 2, Tab. 2). Accordingly, several high incidences of T1D are found in northern city of China with lower daytime period during winter (Yang et al. 1998).

To test the relation between T1D and daytime, the relation between monthly T1D incidence and monthly average night duration was also investigated for 19 European countries (Fig. 3). T1D incidence is estimated with a circannual rhythm approximated with cosinus regression ( $r^2=0,71$ ) and night duration strongly correlates with T1D monthly incidence ( $r^2=0,82$ ) suggesting a potent role for photoperiod variation along the year in T1D etiology. Night duration remains the only variable significantly associated with T1D incidence once adjusted for irradiance (Fig 3 d). This result confirms the association between T1D incidence and Daytime/Night duration on the temporal scale for European countries.

The positive association between sunshine and T2D (Tab. I) is unexpected because sunshine will normally increase vitamin D synthesis and high level of vitamin D normally decreases T2D risk (Martin and Campbell, 2011). Other factors might explain this result, very high sunshine may decrease physical activity during those period as reported in Qatar (Donnelly et al. 2018). Moreover, Fonseca and al. (1984) have already reported frequent vitamin D deficiency in Saudi Arabian women even if the country is very sunny, possibly because of custom and sedentary lifestyle. Interestingly, national distribution of T2D in India have higher prevalence in South India (Atre 2019) which is in agreement with a positive association between T2D and sunshine.

High temperature reduces brown adipose tissue (BAT) catabolism, glucose combustion (Speakman and Sahar Heidari-Bakavoli, 2016) and insulin sensitivity (Peres et al. 2019) increasing the risk for hyperglycemia and diabetes. Higher temperature may also decrease the outdoor physical activity over a certain threshold as it was observed for a senior cohort in Japan (Togo et al. 2005). Moreover, once adjusted with sunshine (Tab. I), temperature is not associated with T2D prevalence. An explanation could be that sunshine generally precedes temperature increase. This result makes sunshine an interesting positive predictor for T2D prevalence ( $r^2=0,48$ ,  $p=7,45 \text{ e-}11$ ).

To sum up, the present model shows that sunshine is relevant for predicting T2D prevalence whereas photoperiod variation is important for studying T1D prevalence and incidence. Possible explanations and mechanisms for this new association will be reviewed hereafter.

T1D etiology is usually explained by the expression of a genetic susceptibility triggered by an environmental factor (Van Belle et al. 2011, Sticht et al. 2021). Environmental factors that have already been studied for T1D etiology are viral or bacterial infection (De Beeck and Eizirik 2017, Price et al. 2019), vitamin D status (Harris 2005, Martin et al. 2011, Mohr et al. 2008, Van Belle 2011) - both of which have not been proved as a direct causal factor (Van Belle 2011) and more recently sleep disorder or circadian and circannual rhythm have also been studied (Rutter et al. 2022, Lebailly 2015, Awuah 2023).

Circadian rhythms are near 24 hours metabolic cycles related to daily activity and those are often connected to circannual rhythm which depends on yearly season, night-day length and biologic constraints (Walton et al.2011, Reiter 1993). Those rhythms are based on ‘Zeitgeber’ stimuli (such as light/dark or feeding/fasting) or time giver stimuli that are giving environmental clues on the time of the day. Day length and photoperiodism gives the most noise free signal to predict time of the year to anticipate and

adapt the metabolism to the milieu (Walton et al. 2011).

Light-Dark zeitgeber is picked up by the retina and passes through the Supra Chiasmatic Nucleus (SCN) (Bailey et al. 2014). SCN is the master circadian clock of the human body and sends signal to pineal gland and to the circadian secondary clocks. Those clocks are specialized cells with autonomous but adaptable cycle and include the insulin producing Beta cell (Peschke 1998, Perelis 2015).

MLN is mainly produced by the pineal gland during dark phase (Walton et al. 2011, Bonmatti-carrion 2014) and is responsible for the synchronization of circadian rhythms (Mayo et al. 2018, Conti 2000). Its serum concentration is low during the day and elevated at night (Mayo et al. 2018, Nussey 2001). Seasons modulate MLN secretion in plasma, maximal mean is reached during the winter solstice in December and the minimum during summer solstice in Jun (Goldman 1992, Tarquini et al. 1997, Wehr 1997, Quin et al. 2013) and are higher at higher latitude during the winter (Cutolo 2005, DaxVivid 2017, Reiter 1993, Adamsson 2018).

Numerous studies have reported that MLN reduces insulin levels (Rasmussen et al. 1999, 2001, Kor et al. 2014) or glucose tolerance in animals and human (Dahr et al. 1984, Cagnacci et al. 2001, Peschke et al. 2013, Rubo-Sastre et al. 2014). Indeed, knock-out of circadian genes (Bmal, Per1) in pancreatic  $\beta$  cell changes melatonin-insulin equilibrium and leads to diabetes (Marcheva et al. 2010, Perelis et al., 2015).

Melatonin receptor 1 B (MTNR1B) variants account for 30 % of genetic susceptibility of T2D for European descendants (Prokopenko et al. 2008) and involve a loss of function of the receptor (Karamitri 2013) and an increase in fasting glucose (Bouatia-Naji et al. 2008). Those patients produce less MLN and insulin at the basal level or after glucose challenge (OGTT) (Tuomi et al., 2016, Lopez-Minguez et al. 2018) suggesting a causal link. Very recently, Daher et

al. also found mutations in an MLN receptor (MTNR1A) associated with renal dysfunction in T1D patients (2024) advocating for the role of MLN signaling in T1D complications.

The variation of daytime across latitude and along season found at high latitude modulates the Light-Dark cycle of individuals (Fig. 3). At 50°N, photoperiod varies between 8 hours/day at winter solstice and 16 hours/day at summer solstice whereas at equator it is nearer to 12 hours/day the whole year. Photoperiod variation observed at high latitude changes the stimulation of SCN and various studies have confirmed the variation of MLN linked to latitude and season (Cuttolo 2005, Adamsson et al. 2017). Photoperiod variation observed at high latitude might cause a circadian disruption as it is observed in several diseases (Bonmatti-Carrion et al. 2014, Bailey 2014, Rutter et al. 2022, Awuah 2023). The Glacer study has also shown an association between several circadian genes' variants (CYR1 and 2 or MTNR1B) and higher glycemia in a season dependent manner for non-diabetic people in Sweden (Renstrom et al. 2015) suggesting an early role of photoperiod response on diabetes onset.

It remains that T1D is highly dependent of genetic and most frequent genes associated with T1D are related to HLA and DR3, DR4-DQ8 variants (Redondo et al. 2018, Pociot et Lenmark. 2016, Cabrera et al. 2016). Those are coding for Major Histocompatibility Complex 2 (MHC 2) and are responsible for microbial antigen presentation but are also involved in the presentation of self-peptides in autoimmunity especially in T1D (Cabrera et al. 2016, Andersson 2011). Several autoantibodies have been found in T1D patients specially insulin autoantibody (Anderson et al. 2011). Current T1D etiology explains that self-antibodies are triggering an autoimmune destruction of beta cell in Langerhans islet from pancreas resulting in deficiency of insulin, hyperglycemia and onset of T1D (Van Belle 2011, Cabrera et al. 2016, Anderson et al. 2011, Kanatsuna et al. 2012). In human, IgG1 is the most precocious and frequent antibody found among insulin autoantibody in human patient (Knip 2008,

Füchtenbusch et al. 2000, Bonifacio et al.1999). Interestingly, MLN and the decrease of photoperiod induces the production of IgG1 and inhibits other Immunoglobulin (Ig) in mice (Černyšiov et al. 2010). Accordingly, IgG are upregulated by short day/long night duration in several animals (Mao 2019, Rastogi 2022).

Concomitantly, MLN acts as modulator of immune system (Szczepanik 2007, Capelli et al. 2002, Piolli et al.2013, Carillo-Vico et al. 2006, Cipolla-Nieto et al. 2018, Anderson and Reiter 2020). Piolli and his colleagues shew that melatonin increased major histocompatibility complexes 2 (MHC 2) expression on splenic macrophage and antigen presentation which in turn increases proliferation of T-lymphocyte. More recently, Golan and his team demonstrated the expansion of hematopoietic stem and progenitor cell (HPSC) induced by darkness and MLN secretion (Golan et al. 2018).

Interestingly, T1D associated genes are often also associated with sleep disorders or circadian rhythm disturbances. For example, HLA-DQ loci are implicated in narcolepsy (Alvarez et al. 1992, Horton et al. 2004) as well as in diabetes (Redondo et al. 2018). Several other genes have been found to be associated with diabetes such as LMO7 or PTPN22, IL-2/IL-2R or FoxP3 and those genes have been linked to sleep disorders or circadian disorders (Pociot et Lenmark. 2016, Bradley et al. 2011, Barrett et al. 2009, Clayton et al. 2005, Lissoni 2000, Mao 2019, Rastogi 2022).

For example, LMO7 variants are also risk factors for long sleep duration (Austin-Zimmerman et al. 2023) and is regulated by day length in other species (Mori 2014, Siepka 2007). PTPN22 is also frequently reported in T1D genes studies, it is a phosphatase involved in the blockage of lymphocytes activation which is important for autoimmune regulation (Rhee and Veillette 2012, Jassim et al. 2023) and PTPN22 is also expressed deferentially in transcriptomic analysis regarding circadian changes (Laing et al. 2017).

Numerous studies have reported sleep disorders in T2D and there is a growing body of evidence for the involvement of sleep disorders in T1D (Perfect et al. 2017, Reutrakul et al. 2016, Borel 2010, 2013). Most common sleep disturbances found in T1D are sleep restriction (Borel et al. 2010) and sleep quality problem which are respectively associated with weaker glycemic control (HbA1c) and sleep obstructive apnea (Borel et al. 2013, Reutrakul 2016, Perfect 2017). Moreover, social jet lag, a kind of circadian misalignment (changes in sleeping schedule because of social activity) is also associated with a significant reduced glycemic control for T1D patients (Larcher et al., 2016, Rusu et al. 2019).

Considering, the association between T1D and night length, sleep disorder and circadian misalignment as well as the important decrease in MLN concentration in T1D patient seems that studying the effect of photoperiod, circadian rhythm and sleep-awake cycle on immune regulation of self-antibodies before the onset of T1D would be interesting.

### **Limit of the study**

This article aims to give a world portrait of diabetes-climate distribution. However, certain regions are less represented because diabetes or climatic data were absent or of low quality. In parallel, certain countries with good dataset but relatively small populations are highly represented such as several Islands or European countries. Also, some countries with big population (China, India etc) have the “same weight” than smaller country in this study.

Studying climate and several solar variables is often associated with multicollinearity problem. Most articles already published about diabetes epidemiology are using only one or two climatic variable which is a risky approach as it is highly prone to multicollinearity, it is also a rationale for the present research. Nevertheless, because of the multicollinear nature linked to solar variables the present results should be taken with caution and confirmed with experimental setting and metanalysis.

Last and not least, circadian rhythm studies have sometimes conflicting results regarding effect of MLN even in GWAS study (Garaulet 2019). A good protocol timing is important to ascertain the results. Also, the use of a nocturnal animal (*Mus musculus*) may not be ideal to infer function in diurnal human. Those problems give more value to epidemiological and ecological studies regarding photoperiod and circannual rhythm. It remains important to identify precise causal factor such as specific moment of the day to act precisely on.

### **Strength of the study**

Near 5,5 billion people are included in this study which is a significant part of world population.

The climatic variables that have been chosen are simple and robust. Little or no transformation of the meteorologic data has been used. This should increase the understanding as well as the reliability of the study. Ground station and astronomical calculated variables are easily accessible.

The use of several variables allows to control multicollinearity problems which is often not considered by other ecological study regarding human health. Several diabetes datasets have been used (IDF, Diamond) for T1D or T2D prevalence and T1D incidence. Their association with climatic variables is consistent and it increases the power of the present research. Also, T1D and T2D are studied simultaneously which is not the case of all diabetic study. Several clinical, epidemiological and experimental articles are in accordance with our results.

At the era of climate change and global warming, this study gives data to assess diabetes-climate association and ideally predict diabetes prevalence.

## Conclusion

This research gives an overview of the association between several climatic factors and diabetes. It uncovers the important association between photoperiod and T1D as well as the association of sunshine with T2D. The association between temperature and diabetes could also be considered for prediction of T2D regarding climate change and global warming. Critical moment of photoperiod should be determined with clinical setting to understand better the relation photoperiod with T1D but also to act on specific moment in individuals' life in order to prevent diabetes.

## Acknowledgment

I would like to share my sincere thanks to Dr Sharif Mohr for his experienced counsels, to Dr Chris Patterson for sharing its diabetes incidence data and his advices and to Dr Mathieu Ferron and the initial work on diabetes in his lab. The author has no relation of interest to declare. This work began with a Molson-Bombardier grant and a merit grant from the faculty of medicine (university of Montreal).

## References

1. International Diabetes Federation. Diabetes Atlas. 10th Edition. 2021. Accessed 20 Jun 2024
2. Venables MC, Jeukendrup AE. Physical inactivity and obesity: links with insulin resistance and type 2 diabetes mellitus. *Diabetes Metab Res Rev*. 2009; 25(S1). <https://doi.org/10.1002/dmrr.983>
3. American Diabetes Association. Standards of Medical Care in Diabetes-2019 Abridged for Primary Care Providers. *Clin Diabetes*. 2019;37(1):11- 34.
4. Akerblom HK and Knip M. Putative environmental factors in Type 1 diabetes. *Diabetes Metab Rev*. 1998 Mar;14(1):31-67.
5. Mohr, S. B., Garland, C. F., Gorham, E. D., & Garland, F. C. (2008). The association between ultraviolet B irradiance, vitamin D status and incidence rates of type 1 diabetes in 51 regions worldwide. *Diabetologia*, 51, 1391-1398.
6. Zhao, Z., Sun, C., Wang, C., Li, P., Wang, W., Ye, J., ... & Luo, F. (2014). Rapidly rising incidence of childhood type 1 diabetes in Chinese population: epidemiology in Shanghai during 1997–2011. *Acta diabetologica*, 51, 947-953.
7. Patterson CC, Gyürüs E, Rosenbauer J, Cinek O, Neu A, Schober E, Parslow RC, Joner G, Svensson J, Castell C, Bingley PJ, Schoenle E, Jarosz-Chobot P, Urbonaitė B, Rothe U, Kržišnik C, Ionescu-Tirgoviste C, Weets I, Kocova M, Stipancic G, Samardzic M, de Beaufort CE, Green A, Soltész G, Dahlquist GG. Seasonal variation in month of diagnosis in children with type 1 diabetes registered in 23 European centers during 1989-2008: little short-term influence of sunshine hours or average temperature. *Pediatr Diabetes*. 2015;16(8):573-80.
8. Waernbaum, I. and Dahlquist, G. (2015) ‘Low mean temperature rather than few sunshine hours are associated with an increased incidence of type 1 diabetes in children’, *European Journal of Epidemiology*, 31(1), pp. 61–65. doi:10.1007/s10654-015-0023-8.
9. Speakman, J. R., & Heidari-Bakavoli, S. (2016). Type 2 diabetes, but not obesity, prevalence is positively associated with ambient temperature. *Scientific Reports*, 6(1), 30409.
10. Minamoto-Higashioka, M., Kawamura, R., Umakoshi, H., Yokomoto-Umakoshi, M., Utsunomiya, D., Osawa, H., & Kondo, S. (2019). Seasonal variation in severe glucose-lowering drug-induced hypoglycemia in patients with type 2 diabetes. *Internal Medicine*, 58(8), 1067-1072.
11. Bailey, S. M., Udoh, U. S., & Young, M. E. (2014). Circadian regulation of metabolism. *Journal of Endocrinology*, 222(2), R75-R96.
12. Hajat, S., Haines, A., Sarran, C., Sharma, A., Bates, C., & Fleming, L. E. (2017). The effect of ambient temperature on type-2-diabetes: case-crossover analysis of 4+ million GP consultations across England. *Environmental health*, 16, 1-8.
13. Si, J., Yu, C., Guo, Y., Bian, Z., Li, X., Yang, L., ... & China Kadoorie Biobank Collaborative Group. (2017). Season of birth and the risk of type 2 diabetes in adulthood: a prospective cohort study of 0.5 million Chinese adults. *Diabetologia*, 60, 836-842.

14. Parmesan, C., Morecroft, M. D., & Trisurat, Y. (2022). Climate change 2022: Impacts, adaptation and vulnerability (Doctoral dissertation, GIEC).
15. Jensen, C.B., Zimmermann, E., Gamborg, M. et al. No evidence of seasonality of birth in adult type 2 diabetes in Denmark. *Diabetologia* 58, 2045–2050 (2015). <https://doi.org/10.1007/s00125-015-3661-1>
16. Jiwa M, Gudes O, Varhol R, et al. Impact of geography on the control of type 2 diabetes mellitus: a review of geocoded clinical data from general practice. *BMJ Open* 2015;5:e009504. doi: 10.1136/bmjopen-2015-009504
17. International Diabetes Federation. *Diabetes Atlas*. 7th Edition. 2017. Accessed 22 Nov 2019
18. Wald, L. (2009). Solar radiation energy (fundamentals). *Encyclopedia of Life Support System (EOLSS)*, Eolss Publishers, Oxford, 44-99.
19. Diabetes Epidemiology Research International Group. Geographic patterns of childhood insulin-independent diabetes mellitus. *Diabetes Epidemiology Research International Group. Diabetes*. 1988;37(8):1113-9.
20. Rewers M, Ludvigsson J. Environmental risk factors for type 1 diabetes. *Lancet*. 2016;387(10035):2340- 2348.
21. Karvonen M, Viik-Kajander M, Moltchanova E, Libman I, LaPorte R, Tuomilehto J. Incidence of childhood type 1 diabetes worldwide. *Diabetes Mondiale (DiaMond) Project Group. Diabetes Care*. 2000;23(10):1516-26.
22. NCD Risk Factor Collaboration (NCD-RisC). Worldwide trends in diabetes since 1980: a pooled analysis of 751 population-based studies with 4.4 million participants. Version 2. *Lancet*. 2016;387(10027):1513- 1530.
23. World Bank. Population percentage below 15 years old in different countries. 2018. <https://data.worldbank.org/indicator/SP.POP.0014.TO.ZS?view=chart> . Accessed 20 Dec 2019.
24. WorldMap Harvard data. Country centroids. 2019. [https://worldmap.harvard.edu/data/geonode:country\\_centroids\\_az8](https://worldmap.harvard.edu/data/geonode:country_centroids_az8). Accessed 5 Jan 2020. 17.
25. National Oceanic and Atmospheric Administration. Solar calculator based on the astronomical equations of Jean Meus. 2019. <https://www.esrl.noaa.gov/gmd/grad/solcalc/calcdetails.html>.
26. National Oceanic and Atmospheric Administration. Global Historical Climatology Network Monthly (version 4). 2018. <https://www.ncdc.noaa.gov/data-access/land-based-station-data/land-baseddatasets/global-historical-climatology-network-monthly-version-4>. Accessed 10 Jan 2020.
27. United Nations data. World Meteorological Organization Standard Normals for sunshine by countries. <http://data.un.org/Data.aspx?q=sunshine&d=CLINO&f=ElementCode%3a15>. Accessed 10 Jan 2020.
28. Mohr, S. B., Garland, C. F., Gorham, E. D., Grant, W. B., & Garland, F. C. (2007). Is ultraviolet B irradiance inversely associated with incidence rates of endometrial cancer: an ecological study of 107 countries. *Preventive medicine*, 45(5), 327-331.



29. Edward J. H. The recognition and estimation of cyclic trends. *Ann. Hum. Genet.* 1961; 25:83-87.
30. Brookhart, M.A., Rothman, K.J. Simple estimators of the intensity of seasonal occurrence. *BMC Med. Res. Methodol.* 2008;8; 67.
31. Susan S. Harris, Vitamin D in Type 1 Diabetes Prevention. *The Journal of Nutrition*, Volume 135, Issue 2, 2005, Pages 323-325, ISSN 0022-3166, <https://doi.org/10.1093/jn/135.2.323>.
32. Martin, T., & Campbell, R. K. (2011). Vitamin D and diabetes. *Diabetes spectrum*, 24(2), 113.
33. Dahlquist, G., & Mustonen, L. (1994). Childhood onset diabetes—time trends and climatological factors. *International journal of epidemiology*, 23(6), 1234-1241.
34. Moltchanova, E. V., Schreier, N., Lammi, N., & Karvonen, M. (2009). Seasonal variation of diagnosis of Type 1 diabetes mellitus in children worldwide. *Diabetic Medicine*, 26(7), 673-678.
35. Patterson, C. C., Gyürüs, E., Rosenbauer, J., Cinek, O., Neu, A., Schober, E., ... & Dahlquist, G. G. (2015). Seasonal variation in month of diagnosis in children with type 1 diabetes registered in 23 European centers during 1989–2008: little short-term influence of sunshine hours or average temperature. *Pediatric diabetes*, 16(8), 573-580.
36. Nishioka, Y., Noda, T., Okada, S., Myojin, T., Kubo, S., Higashino, T., ... & Imamura, T. (2020). Incidence and seasonality of type 1 diabetes: a population-based 3-year cohort study using the National Database in Japan. *BMJ Open Diabetes Research and Care*, 8(1), e001262.
37. Shrestha, N. (2020). Detecting multicollinearity in regression analysis. *American Journal of Applied Mathematics and Statistics*, 8(2), 39-42.
38. Walton, J. C., Weil, Z. M., & Nelson, R. J. (2011). Influence of photoperiod on hormones, behavior, and immune function. *Frontiers in neuroendocrinology*, 32(3), 303-319.
39. Peres Valgas da Silva, C., Hernández-Saavedra, D., White, J. D., & Stanford, K. I. (2019). Cold and exercise: therapeutic tools to activate brown adipose tissue and combat obesity. *Biology*, 8(1), 9.
40. Togo, F., Watanabe, E., Park, H. et al. Meteorology and the physical activity of the elderly: the Nakanajo Study. *Int J Biometeorol* 50, 83–89 (2005).
41. Donnelly, T.T. et al. (2018) ‘Arab female and male perceptions of factors facilitating and inhibiting their physical activity: Findings from a qualitative study in the Middle East’, *PLOS ONE*, 13(7). doi:10.1371/journal.pone.0199336.
42. Fonseca, V., Tongia, R., El-Hazmi, M., & Abu-Aisha, H. (1984). Exposure to sunlight and vitamin D deficiency in Saudi Arabian women. *Postgraduate medical journal*, 60(707), 589-591.
43. Atre, S. (2019) ‘The burden of diabetes in India’, *The Lancet Global Health*, 7(4). doi:10.1016/s2214-109x(18)30556-4.

44. Ze Yang, Kean Wang, Tianlin Li, Wei Sun, Yurui Li, Yue-Fang Chang, Janice S Dorman, Ronald E LaPorte; Childhood Diabetes in China: Enormous variation by place and ethnic group. *Diabetes Care* 1 April 1998; 21 (4): 525–529. <https://doi.org/10.2337/diacare.21.4.525>
45. Van Belle TL, Coppieters KT, von Herrath MG. Type 1 Diabetes: Etiology, Immunology, and Therapeutic Strategies. *Physiol Rev* 91: 79–118, 2011 doi:10.1152/physrev.00003.2010.
46. Sticht, J., Álvaro-Benito, M., & Konigorski, S. (2021). Type 1 diabetes and the HLA region: genetic association besides classical HLA class II genes. *Frontiers in Genetics*, 12, 683946.
47. Op de Beeck, A., & Eizirik, D. L. (2016). Viral infections in type 1 diabetes mellitus—why the  $\beta$  cells?. *Nature Reviews Endocrinology*, 12(5), 263-273.
48. Price, R.H.M., Graham, C. & Ramalingam, S. Association between viral seasonality and meteorological factors. *Sci Rep* 9, 929 (2019). <https://doi.org/10.1038/s41598-018-37481-y>
49. Lebailly, B., Boitard, C., & Rogner, U. C. (2015). Circadian rhythm-related genes: implication in autoimmunity and type 1 diabetes. *Diabetes, Obesity and Metabolism*, 17, 134-138.
50. Femke Rutters & Giesje Nefs (2022) Sleep and Circadian Rhythm Disturbances in Diabetes: A Narrative Review, *Diabetes, Metabolic Syndrome and Obesity: Targets and Therapy*, , 3627-3637, DOI: 10.2147/DMSO.S354026
51. Awuah, Wireko Andrew; Huang, Helen; Kalmanovich, Jacob; Mehta, Aashna; Mikhailova, Tatiana; Ng, Jyi Cheng; et al. (2023). Circadian rhythm in systemic autoimmune conditions: potential of chrono-immunology in clinical practice: a narrative review. *Royal College of Surgeons in Ireland. Journal contribution*. <https://hdl.handle.net/10779/rcsi.23999847.v1>
52. La Fleur SE, Kalsbeek A, Wortel J, Buijs RM. A suprachiasmatic nucleus generated rhythm in basal glucose concentrations. *J Neuroendocrinol*. 1999; 11:643–652. [PubMed: 10447803]
53. Peng, F., Li, X., Xiao, F., Zhao, R., & Sun, Z. (2022). Circadian clock, diurnal glucose metabolic rhythm, and dawn phenomenon. *Trends in neurosciences*, 45(6), 471-482.
54. Bonmati-Carrion, M. A., Arguelles-Prieto, R., Martinez-Madrid, M. J., Reiter, R., Hardeland, R., Rol, M. A., & Madrid, J. A. (2014). Protecting the melatonin rhythm through circadian healthy light exposure. *International journal of molecular sciences*, 15(12), 23448-23500.
55. Renström, F., Koivula, R. W., Varga, T. V., Hallmans, G., Mulder, H., Florez, J. C., ... & Franks, P. W. (2015). Season-dependent associations of circadian rhythm-regulating loci (CRY1, CRY2 and MTNR1B) and glucose homeostasis: the GLACIER Study. *Diabetologia*, 58, 997-1005.
56. Marcheva B, Ramsey KM, Buhr ED, Kobayashi Y, Su H, Ko CH, Ivanova G, Omura C, Mo S, Vitaterna MH, Lopez JP, Philipson LH, Bradfield CA, Crosby SD, JeBailey L, Wang X, Takahashi JS, Bass J. Disruption of the clock components CLOCK and BMAL1 leads to hypoinsulinaemia and diabetes. *Nature*. 2010;29;466(7306):627-31.

57. Peschke E, Peschke D. Evidence for a circadian rhythm of insulin release from perfused rat pancreatic islets. *Diabetologia*. 1998;41:1085–1092. 55.
58. Perelis M, Marcheva B, Ramsey KM, Schipma MJ, Hutchison AL, Taguchi A, et al. Pancreatic beta cell enhancers regulate rhythmic transcription of genes controlling insulin secretion. *Science*. 2015;350(6261):aac4250. 56.
59. Scheer FA, Hilton MF, Mantzoros CS, Shea SA. Adverse metabolic and cardiovascular consequences of circadian misalignment. *Proc Natl Acad Sci U S A*. 2009; 17;106(11):4453-8. 57.
60. Oster, H., Challet, E., Ott, V., Arvat, E., de Kloet, E. R., Dijk, D. J., ... & Van Cauter, E. (2017). The functional and clinical significance of the 24-hour rhythm of circulating glucocorticoids. *Endocrine reviews*, 38(1), 3-45.
61. Brossaud, J., Corcuff, J. B., Vautier, V., Bergeron, A., Valade, A., Lienhardt, A., ... & Barat, P. (2021). Altered cortisol metabolism increases nocturnal cortisol bioavailability in prepubertal children with type 1 diabetes mellitus. *Frontiers in Endocrinology*, 12, 742669
62. Dickmeis, T., Weger, B. D., & Weger, M. (2013). The circadian clock and glucocorticoids–interactions across many time scales. *Molecular and cellular endocrinology*, 380(1-2), 2-15.
63. O'Byrne, N. A., Yuen, F., Butt, W. Z., & Liu, P. Y. (2021). Sleep and circadian regulation of cortisol: a short review. *Current opinion in endocrine and metabolic research*, 18, 178-186.
64. Arrais, R. F., & Dib, S. A. (2006). The hypothalamus–pituitary–ovary axis and type 1 diabetes mellitus: a mini review. *Human reproduction*, 21(2), 327-337.
65. Persson, R., Garde, A. H., Hansen, Å. M., Österberg, K., Larsson, B., Ørbæk, P., & Karlson, B. (2008). Seasonal variation in human salivary cortisol concentration. *Chronobiology international*, 25(6), 923-937.
66. Faresjö, Å., LeTran, A., Olsen, O. J., Faresjö, T., Theodorsson, E., & Jones, M. (2023). Measuring cortisol concentration in hair month-by-month two years retrospectively. *All Life*, 16(1), 2172461.
67. R. E. Peter, A. Hontela, A. F. Cook, and C. R. Paulencu. 1978. Daily cycles in serum cortisol levels in the goldfish: effects of photoperiod, temperature, and sexual condition. *Canadian Journal of Zoology*. 56(11): 2443-2448. <https://doi.org/10.1139/z78-329>
68. Angus Cameron, David Henley, Robin Carrell, Aiwu Zhou, Anthony Clarke, Stafford Lightman, Temperature-Responsive Release of Cortisol from Its Binding Globulin: A Protein Thermocouple, *The Journal of Clinical Endocrinology & Metabolism*, Volume 95, Issue 10, 1 October 2010, Pages 4689–4695, <https://doi.org/10.1210/jc.2010-0942>
69. Walker BR, Best R, Noon JP, Watt GCM, Webb DJ. Seasonal variation in glucocorticoid activity in healthy men. *J Clin Endocrinol Metab* 1997;82:4015–9

- 70.Engeland WC, Massman L, Mishra S, Yoder JM, Leng S, Pignatti E, Piper ME, Carlone DL, Breault DT, Kofuji P. The Adrenal Clock Prevents Aberrant Light-Induced Alterations in Circadian Glucocorticoid Rhythms. *Endocrinology*. 2018;1;159(12):3950-3964. 58.
- 71.Nader N, Chrousos GP, Kino T. Interactions of the circadian CLOCK system and the HPA axis. *Trends Endocrinol Metab*. 2010;21(5):277-86.
- 72.Lyssenkov, V., Nagorny, C., Erdos, M. et al. Common variant in MTNR1B associated with increased risk of type 2 diabetes and impaired early insulin secretion. *Nat Genet* 41, 82–88 (2009). <https://doi.org/10.1038/ng.288>
- 73.Prokopenko, I., Langenberg, C., Florez, J. et al. Variants in MTNR1B influence fasting glucose levels. *Nat Genet* 41, 77–81 (2009). <https://doi.org/10.1038/ng.290>
- 74.Daher, G., Santos-Bezerra, D. P., Cavaleiro, A. M., Pelaes, T. S., Admoni, S. N., Perez, R. V., ... & Correa-Giannella, M. L. (2024). Rs4862705 in the melatonin receptor 1A gene is associated with renal function decline in type 1 diabetes individuals. *Frontiers in Endocrinology*, 15, 1331012.
- 75.Cutolo, M., Maestroni, G. J. M., Otsa, K., Aakre, O., Villaggio, B., Capellino, S., ... & Sulli, A. (2005). Circadian melatonin and cortisol levels in rheumatoid arthritis patients in winter time: a north and south Europe comparison. *Annals of the Rheumatic Diseases*, 64(2), 212-216.
- 76.Adamsson, M., Laike, T., & Morita, T. (2017). Annual variation in daily light exposure and circadian change of melatonin and cortisol concentrations at a northern latitude with large seasonal differences in photoperiod length. *Journal of physiological anthropology*, 36, 1-15.
- 77.Bouatia-Naji N, Bonnefond A, Cavalcanti-Proença C, Sparsø T, Holmkvist J, Marchand M, Delplanque J, Lobbens S, Rocheleau G, Durand E, De Graeve F, Chèvre JC, Borch-Johnsen K, Hartikainen AL, Ruukonen A, Tichet J, Marre M, Weill J, Heude B, Tauber M, Lemaire K, Schuit F, Elliott P, Jørgensen T, Charpentier G, Hadjadj S, Cauchi S, Vaxillaire M, Sladek R, Visvikis-Siest S, Balkau B, Lévy-Marchal C, Pattou F, Meyre D, Blakemore AI, Jarvelin MR, Walley AJ, Hansen T, Dina C, Pedersen O, Froguel P. A variant near MTNR1B is associated with increased fasting plasma glucose levels and type 2 diabetes risk. *Nat Genet*. 2009 Jan;41(1):89-94. doi: 10.1038/ng.277. Epub 2008 Dec 7. PMID: 19060909.
- 78.Tuomi, T., Nagorny, C. L., Singh, P., Bennet, H., Yu, Q., Alenkvist, I., ... & Mulder, H. (2016). Increased melatonin signaling is a risk factor for type 2 diabetes. *Cell metabolism*, 23(6), 1067-1077.
- 79.Lopez-Minguez, J., Saxena, R., Bandín, C., Scheer, F. A., & Garaulet, M. (2018). Late dinner impairs glucose tolerance in MTNR1B risk allele carriers: A randomized, cross-over study. *Clinical Nutrition*, 37(4), 1133-1140.
- 80.Mayo JC, Aguado A, Cernuda-Cernuda R, Álvarez-Artime A, Cepas V, Quirós-González I, Hevia D, Sáinz RM. Melatonin Uptake by Cells: An Answer to Its Relationship with Glucose? *Molecules*. 2018;23(8):1999.

- 81.Reiter, R. J. (1993). The melatonin rhythm: both a clock and a calendar. *Experientia*, 49, 654-664.
- 82.Nussey S, Whitehead S. Chapter 7 The pituitary gland In : *Endocrinology: An Integrated Approach*. BIOS Scientific Publishers (Oxford). 2001.  
<https://www.ncbi.nlm.nih.gov/books/NBK27/> . Accessed 16 May 2020.
- 83.Qin, L.Q., Li, J., Wang, Y., Wang, J., Xu, J.Y., Kaneko, T. The effects of nocturnal life on endocrine circadian patterns in healthy adults. *Life Sci.* 2003 ; 73 ; 2467–2475.
- 84.Wehr, T. A. (1997). Melatonin and seasonal rhythms. *Journal of biological rhythms*, 12(6), 518-527.
- 85.Goldman, B. D., & Nelson, R. J. (1992). Melatonin and seasonality in mammals. *Melatonin*, 225-252.
- 86.Tarquini, B., Cornelissen, G., Perfetto, F., Tarquini, R., & Halberg, F. (1997). Chronome assessment of circulating melatonin in humans. *In vivo*, 11(6), 473-484
- 87.Rasmussen, D.D., Mitton, D.R., Larsen, S.A., Yellon, S.M. Aging-dependent changes in the effect of daily melatonin supplementation on rat metabolic and behavioral responses. *J. Pineal Res.* 2001;31;89– 94. 38.
- 88.Dhar, M., Dayal, S.S., Ramesh Babu, C.S., Arora, S.R. Effect of melatonin on glucose tolerance and blood glucose circadian rhythm in rabbits. *Indian J. Physiol. Pharmacol.* 1983;27;109–117. 39.
- 89.Cagnacci, A., Arangino, S., Renzi, A., Paoletti, A.M., Melis, G.B., Cagnacci, P., Volpe, A. Influence of melatonin administration on glucose tolerance and insulin sensitivity of postmenopausal women. *Clin. Endocrinol. (Oxf.)* 2001;54;339–346. 40.
- 90.Peschke E., Bahr I., Muhlbauer E. Melatonin and Pancreatic Islets : Interrelationships between Melatonin, Insulin and Glucagon. *Int. J. of Mol. Sci.* 2013 ;14 ;6981-7015
- 91.Patricia Rubio-Sastre, Frank A.J.L. Scheer, Purificación Gómez-Abellán, Juan A. Madrid, Marta Garaulet, Acute Melatonin Administration in Humans Impairs Glucose Tolerance in Both the Morning and Evening, *Sleep*, Volume 37, Issue 10, 1 October 2014, Pages 1715–1719, <https://doi.org/10.5665/sleep.4088>
- 92.Adamsson, M., Laike, T., & Morita, T. (2017). Annual variation in daily light exposure and circadian change of melatonin and cortisol concentrations at a northern latitude with large seasonal differences in photoperiod length. *Journal of physiological anthropology*, 36, 1-15.
- 93.Hadlow, N. C., Brown, S., Wardrop, R., & Henley, D. (2014). The effects of season, daylight saving and time of sunrise on serum cortisol in a large population. *Chronobiology international*, 31(2), 243-251.
- 94.Garaulet, M., Qian, J., Florez, J. C., Arendt, J., Saxena, R., & Scheer, F. A. (2020). Melatonin effects on glucose metabolism: time to unlock the controversy. *Trends in Endocrinology & Metabolism*, 31(3), 192-204.

95. Cabrera, S. M., Henschel, A. M., & Hessner, M. J. (2016). Innate inflammation in type 1 diabetes. *Translational Research*, 167(1), 214-227.
96. Conti, A., Conconi, S., Hertens, E., Skwarlo-Sonta, K., Markowska, M., & Maestroni, G. J. (2000). Evidence for melatonin synthesis in mouse and human bone marrow cells. *Journal of pineal research*, 28(4), 193-202.
97. Feuerer, M., Beckhove, P., Garbi, N., Mahnke, Y., Limmer, A., Hommel, M., ... & Schirmacher, V. (2003). Bone marrow as a priming site for T-cell responses to blood-borne antigen. *Nature medicine*, 9(9), 1151-1157.
98. Hernández-Malmierca, P., Vonficht, D., Schnell, A., Uckelmann, H. J., Bollhagen, A., Mahmoud, M. A., ... & Haas, S. (2022). Antigen presentation safeguards the integrity of the hematopoietic stem cell pool. *Cell Stem Cell*, 29(5), 760-775.
99. Reiter, R. J., Calvo, J. R., Karbownik, M., Qi, W., & Tan, D. X. (2000). Melatonin and its relation to the immune system and inflammation. *Annals of the New York Academy of Sciences*, 917(1), 376-386.
100. Carrillo-Vico, A., Reiter, R. J., Lardone, P. J., Herrera, J. L., Fernández-Montesinos, R., Guerrero, J. M., & Pozo, D. (2006). The modulatory role of melatonin on immune responsiveness. *Current opinion in investigational drugs*, 7(5), 423.
101. Baxter, M., & Ray, D. W. (2020). Circadian rhythms in innate immunity and stress responses. *Immunology*, 161(4), 261-267.
102. Cipolla-Neto, J., & Amaral, F. G. D. (2018). Melatonin as a hormone: new physiological and clinical insights. *Endocrine reviews*, 39(6), 990-1028.
103. Lin, G. J., Huang, S. H., Chen, S. J., Wang, C. H., Chang, D. M., & Sytwu, H. K. (2013). Modulation by melatonin of the pathogenesis of inflammatory autoimmune diseases. *International journal of molecular sciences*, 14(6), 11742-11766.
104. Anderson, G., & Reiter, R. J. (2020). Melatonin: roles in influenza, Covid-19, and other viral infections. *Reviews in medical virology*, 30(3), e2109.
105. Capelli, E., Campo, I., Panelli, S., Damiani, G., Barbone, M. G. S., Lucchelli, A., & Cuccia, M. (2002). Evaluation of gene expression in human lymphocytes activated in the presence of melatonin. *International immunopharmacology*, 2(7), 885-892.
106. Szczepanik, M. (2007). Melatonin and its influence on immune system. *Journal of physiology and pharmacology*, 58(6), 115-124.
107. Pioli C, Caroleo MC, Nistico G, Doria G. Melatonin increases antigen presentation and amplifies specific and non specific signals for T-cell proliferation. *Int J Immunopharmacol*. 1993 May;15(4):463-8. doi: 10.1016/0192-0561(93)90060-c. PMID: 8365822.

108. Wan, X., & Unanue, E. R. (2017). Unique features in the presentation of insulin epitopes in autoimmune diabetes: an update. *Current Opinion in Immunology*, 46, 30–37.  
doi:10.1016/j.coi.2017.04.001
109. Andersson, C., Larsson, K., Vaziri-Sani, F., Lynch, K., Carlsson, A., Cedervall, E., ... & Ivarsson, S. A. (2011). The three ZNT8 autoantibody variants together improve the diagnostic sensitivity of childhood and adolescent type 1 diabetes. *Autoimmunity*, 44(5), 394-405.
110. Kanatsuna, N., Papadopoulos, G. K., Moustakas, A. K., & Lenmark, Å. (2012). Etiopathogenesis of insulin autoimmunity. *Anatomy research international*, 2012(1), 457546.
111. Redondo MJ, Geyer S, Steck AK, Sharp S, Wentworth JM, Weedon MN, Antinozzi P, Sosenko J, Atkinson M, Pugliese A, Oram RA; Type 1 Diabetes TrialNet Study Group. A Type 1 Diabetes Genetic Risk Score Predicts Progression of Islet Autoimmunity and Development of Type 1 Diabetes in Individuals at Risk. *Diabetes Care*. 2018 Sep;41(9):1887-1894. doi: 10.2337/dc18-0087. Epub 2018 Jul 12. PMID: 30002199; PMCID: PMC6105323.
112. De Luis, D. A., Sagrado, M. G., Aller, R., Izaola, O., Conde, R., & Romero, E. (2010). C358A missense polymorphism of the endocannabinoid degrading enzyme fatty acid amide hydrolase (FAAH) and insulin resistance in patients with diabetes mellitus type 2. *Diabetes research and clinical practice*, 88(1), 76-80.
113. Mori, A., Kappen, K. L., Dilger, A. C., & Swanson, K. S. (2014). Effect of photoperiod on the feline adipose transcriptome as assessed by RNA sequencing. *BMC veterinary research*, 10, 1-13.
114. Siepkka, S. M., Yoo, S. H., Park, J., Song, W., Kumar, V., Hu, Y., ... & Takahashi, J. S. (2007). Circadian mutant Overtime reveals F-box protein FBXL3 regulation of cryptochrome and period gene expression. *Cell*, 129(5), 1011-1023.
115. Pociot F, Lernmark Å. Genetic risk factors for type 1 diabetes. *Lancet*. 2016 Jun 4;387(10035):2331-2339. doi: 10.1016/S0140-6736(16)30582-7. PMID: 27302272.
116. Alvarez, B., Dahlitz, M. J., Vignau, J., & Parkes, J. D. (1992). The delayed sleep phase syndrome: clinical and investigative findings in 14 subjects. *Journal of Neurology, Neurosurgery & Psychiatry*, 55(8), 665–670. doi:10.1136/jnnp.55.8.665
117. Singal DP, Blajchman MA. Histocompatibility (HL-A) antigens, lymphocytotoxic antibodies and tissue antibodies in patients with diabetes mellitus. *Diabetes*. 1973 Jun;22(6):429-32. doi: 10.2337/diab.22.6.429. PMID: 4541338.
118. Pichon, L., Giffon, T., Chauvel, B., Le Gall, J. Y., & David, V. (1996). La région HLA de classe I: une organisation compliquée par la présence de nombreuses familles multigéniques. *MS. Médecine sciences*, 12(11), 1209-1218.
119. Clayton, D. G. (2009). Prediction and interaction in complex disease genetics: experience in type 1 diabetes. *PLoS genetics*, 5(7), e1000540.

120. Austin-Zimmerman, I., Levey, D. F., Giannakopoulou, O., Deak, J. D., Galimberti, M., Adhikari, K., ... & Gelernter, J. (2023). Genome-wide association studies and cross-population meta-analyses investigating short and long sleep duration. *Nature Communications*, 14(1), 6059.
121. Horton, R., Wilming, L., Rand, V., Lovering, R. C., Bruford, E. A., Khodiyar, V. K., ... & Beck, S. (2004). Gene map of the extended human MHC. *Nature Reviews Genetics*, 5(12), 889-899.
122. Lebailly, B., Boitard, C., & Rogner, U. C. (2015). Circadian rhythm-related genes: implication in autoimmunity and type 1 diabetes. *Diabetes, Obesity and Metabolism*, 17, 134-138.
123. Daher, G., Santos-Bezerra, D. P., Cavaleiro, A. M., Pelaes, T. S., Admoni, S. N., Perez, R. V., ... & Correa-Giannella, M. L. (2024). Rs4862705 in the melatonin receptor 1A gene is associated with renal function decline in type 1 diabetes individuals. *Frontiers in Endocrinology*, 15, 1331012.
124. Van Belle, T. L., Coppieters, K. T., & Von Herrath, M. G. (2011). Type 1 diabetes: etiology, immunology, and therapeutic strategies. *Physiological reviews*, 91(1), 79-118.
125. Černyšiov, V., Gerasimčik, N., Mauricas, M., & Girkontaitė, I. (2010). Regulation of T-cell-independent and T-cell-dependent antibody production by circadian rhythm and melatonin. *International immunology*, 22(1), 25-34.
126. Knip, M., & Siljander, H. (2008). Autoimmune mechanisms in type 1 diabetes. *Autoimmunity reviews*, 7(7), 550-557.
127. Fuchtenbusch, M., Kredel, K., Bonifacio, E., Schnell, O., & Ziegler, A. G. (2000). Exposure to exogenous insulin promotes IgG1 and the T-helper 2-associated IgG4 responses to insulin but not to other islet autoantigens. *Diabetes*, 49(6), 918-925.
128. Bonifacio E, Scirpoli M, Kredel K, Fuchtenbusch M, Ziegler AG (1999) Early autoantibody responses in prediabetes are IgG1 dominated and suggest antigen-specific regulation. *J Immunol* 163:525–532
129. Schwitzgebel, V. M. (2014). Many faces of monogenic diabetes. *Journal of diabetes investigation*, 5(2), 121-133.
130. Vesperas, A., & Vignali, D. A. (2016). Are regulatory T cells defective in type 1 diabetes and can we fix them?. *The Journal of Immunology*, 197(10), 3762-3770.
131. Boyman, O., & Sprent, J. (2012). The role of interleukin-2 during homeostasis and activation of the immune system. *Nature Reviews Immunology*, 12(3), 180-190.
132. Akbulut, K. G., Gönül, B., & Akbulut, H. (1998). The effects of melatonin on humoral immune responses of young and aged rats. *Pathophysiology*, 1001(5), 146.



133. Alvarez, B., Dahlitz, M. J., Vignau, J., & Parkes, J. D. (1992). The delayed sleep phase syndrome: clinical and investigative findings in 14 subjects. *Journal of Neurology, Neurosurgery & Psychiatry*, 55(8), 665–670. doi:10.1136/jnnp.55.8.665
134. Austin-Zimmerman, I., Levey, D. F., Giannakopoulou, O., Deak, J. D., Galimberti, M., Adhikari, K., ... & Gelernter, J. (2023). Genome-wide association studies and cross-population meta-analyses investigating short and long sleep duration. *Nature Communications*, 14(1), 6059.
135. Rhee, I., & Veillette, A. (2012). Protein tyrosine phosphatases in lymphocyte activation and autoimmunity. *Nature immunology*, 13(5), 439-447.
136. Jassim, B. A., Lin, J., & Zhang, Z. Y. (2022). PTPN22: Structure, function, and developments in inhibitor discovery with applications for immunotherapy. *Expert opinion on drug discovery*, 17(8), 825-837.
137. Laing, E. E., Möller-Levet, C. S., Poh, N., Santhi, N., Archer, S. N., & Dijk, D. J. (2017). Blood transcriptome based biomarkers for human circadian phase. *Elife*, 6, e20214.
138. Prospéro-García, O., Amancio-Belmont, O., Meléndez, A. L. B., Ruiz-Contreras, A. E., & Méndez-Díaz, M. (2016). Endocannabinoids and sleep. *Neuroscience & Biobehavioral Reviews*, 71, 671-679.
139. Liu, J., Wang, L., Harvey-White, J., Osei-Hyiaman, D., Razdan, R., Gong, Q., ... & Kunos, G. (2006). A biosynthetic pathway for anandamide. *Proceedings of the National Academy of Sciences*, 103(36), 13345-13350.
140. De Luis, D. A., Sagrado, M. G., Aller, R., Izaola, O., Conde, R., & Romero, E. (2010). C358A missense polymorphism of the endocannabinoid degrading enzyme fatty acid amide hydrolase (FAAH) and insulin resistance in patients with diabetes mellitus type 2. *Diabetes research and clinical practice*, 88(1), 76-80.
141. Mechoulam, R., Frider, E., Hanu, L., Sheskin, T., Bisogno, T., Di Marzo, V., ... & Vogel, Z. (1997). Anandamide may mediate sleep induction. *Nature*, 389(6646), 25-26.
142. Lissoni, P., Tassoni, S., Messina, G., Tomasi, M., Porro, G., & Di Fede, G. (2022). Neuroimmune Therapy of Autoimmune Diseases with the Pineal Hormone Melatonin Plus Cannabidiol and its Effects on Auto-Antibody Secretion. *Clin. Res. Neurol*, 4(4).
143. Liu, J., Wang, L., Harvey-White, J., Osei-Hyiaman, D., Razdan, R., Gong, Q., ... & Kunos, G. (2006). A biosynthetic pathway for anandamide. *Proceedings of the National Academy of Sciences*, 103(36), 13345-13350.
144. Kesner, A. J., & Lovinger, D. M. (2020). Cannabinoids, endocannabinoids and sleep. *Frontiers in molecular neuroscience*, 13, 125.
145. Carbonetto, P., & Stephens, M. (2013). Integrated enrichment analysis of variants and pathways in genome-wide association studies indicates central role for IL-2 signaling genes in type 1 diabetes, and cytokine signaling genes in Crohn's disease. *PLoS genetics*, 9(10), e1003770.

146. Lissoni P, Bolis S, Brivio F, Fumagalli L. A phase II study of neuroimmunotherapy with subcutaneous low-dose IL-2 plus the pineal hormone melatonin in untreatable advanced hematologic malignancies. *Anticancer Res.* 2000 May-Jun;20(3B):2103-5. PMID: 10928160.
147. Hulme, M. A., Wasserfall, C. H., Atkinson, M. A., & Brusko, T. M. (2012). Central role for interleukin-2 in type 1 diabetes. *Diabetes*, 61(1), 14-22.
148. Mao, C., Xu, Y., Shi, L., Guo, S., Jin, X., Yan, S., & Shi, B. (2019). Effects of photoperiod change on melatonin secretion, immune function and antioxidant status of cashmere goats. *Animals*, 9(10), 766.
149. Rastogi, S., & Haldar, C. (2023). Seasonal plasticity in immunocompetent cytokines (IL-2, IL-6, and TNF- $\alpha$ ), myeloid progenitor cell (CFU-GM) proliferation, and LPS-induced oxido-inflammatory aberrations in a tropical rodent *Funambulus pennanti*: role of melatonin. *Cell Stress and Chaperones*, 28(5), 567-582.
150. Zier, K. S., Leo, M. M., Spielman, R. S., & Baker, L. (1984). Decreased synthesis of interleukin-2 (IL-2) in insulin-dependent diabetes mellitus. *Diabetes*, 33(6), 552-555.
151. Lissoni, P., Rovelli, F., Brivio, F., Brivio, O., & Fumagalli, L. (1998). Circadian Secretions of IL-2, IL-12, IL-6 and IL-10 in Relation to the Light/Dark Rhythm of the Pineal Hormone Melatonin in Healthy Humans. *Natural Immunity*, 16(1), 1–5. doi:10.1159/000069464
152. Born, J., Lange, T., Hansen, K., Mölle, M., & Fehm, H. L. (1997). Effects of sleep and circadian rhythm on human circulating immune cells. *Journal of immunology (Baltimore, Md.: 1950)*, 158(9), 4454-4464.
153. Perfect M. M. Sleep-related disorders in patients with type 1 diabetes mellitus: current insights. *Nat. and Sci. of Sleep.* 2020;12;101-123.
154. Sirimon Reutrakul, Ammarin Thakkinstian, Thunyarat Anothaisintawee, Sasipas Chontong, Anne-Laure Borel, Michelle M. Perfect, Carolina Castro Porto Silva Janovsky, Romain Kessler, Bernd Schultes, Igor Alexander Harsch, Marieke van Dijk, Didier Bouhassira, Bartłomiej Matejko, Rebecca B. Lipton, Parawee Suwannalai, Naricha Chirakalwasan, Anne-Katrin Schober, Kristen L. Knutson, Sleep characteristics in type 1 diabetes and associations with glycemic control: systematic review and meta-analysis, *Sleep Medicine*, Volume 23, 2016, Pages 26-45, ISSN 1389-9457, <https://doi.org/10.1016/j.sleep.2016.03.019>.
155. Larcher S, Gauchez AS, Lablanche S, Pépin JL, Benhamou PY, Borel AL. Impact of sleep behavior on glycemic control in type 1 diabetes : the role of social jetlag. *Eur. J. of endocrinol.* 2016 ; 175 (5) ; 411- 419.
156. Rusu, A., Ciobanu, D., Bala, C., Cerghizan, A., & Roman, G. (2019). Social jetlag, sleep-related parameters, and glycemic control in adults with type 1 diabetes: Results of a cross-sectional study. *Journal of Diabetes*, 11(5), 394-401.

157. Borel AL, Pepin JL, Nasse L, Baguet JP, Netter S & Benhamou PY. Short sleep duration measured by wrist actimetry is associated with deteriorated glycemic control in type 1 diabetes. *Diabetes Care* 2013 36 2902–2908. (doi:10.2337/dc12-2038)
158. Borel AL, Benhamou PY, Baguet JP, Halimi S, Levy P, Mallion JM & Pepin JL. High prevalence of obstructive sleep apnoea syndrome in a type 1 diabetic adult population: a pilot study. *Diabetic Medicine* 2010 27 1328–1329. (doi:10.1111/j.1464-5491.2010.03096.x)
159. Ba-Ali, S., Brøndsted, A. E., Andersen, H. U., Sander, B., Jennum, P. J., & Lund-Andersen, H. (2019). Assessment of diurnal melatonin, cortisol, activity, and sleep–wake cycle in patients with and without diabetic retinopathy. *Sleep medicine*, 54, 35-42.
160. Hikichi, T., Tateda, N., & Miura, T. (2011). Alteration of melatonin secretion in patients with type 2 diabetes and proliferative diabetic retinopathy. *Clinical ophthalmology*, 655-660.
161. Kor Y, Geyikli I, Keskin M, Akan M. Preliminary study: Evaluation of melatonin secretion in children and adolescents with type 1 diabetes mellitus. *Indian J Endocrinol Metab*. 2014;18(4):565-8.
162. ViviD, D., & Bentley, G. E. (2018). Seasonal reproduction in vertebrates: melatonin synthesis, binding, and functionality using Tinbergen’s four questions. *Molecules*, 23(3), 652.
163. Karamitri, A., Vincens, M., Chen, M., & Jockers, R. (2013). Implication des mutations du récepteur de la mélatonine MT2 dans la survenue du diabète de type 2. *médecine/sciences*, 29(8-9), 778-784.
164. Walford, G. A., Green, T., Neale, B., Isakova, T., Rotter, J. I., Grant, S. F. A., ... & Florez, J. C. (2012). Common genetic variants differentially influence the transition from clinically defined states of fasting glucose metabolism. *Diabetologia*, 55, 331-339.
